# Supplementary material
Source: PubMed Central journal article supplement (PMC4832767)
Supplement: supp_heartasia-2014-010551_heartasia-2014-010551supp_table.pdf [file supp_heartasia-2014-010551_heartasia-2014-010551supp_table.pdf]

Supplementary Table 1:

**TABLE 6: POPULATION IN DIFFERENT AGE GROUPS AND THEIR PROPORTIONS TO TOTAL POPULATION**

| Age group                                                      | Population    | Percentage |
|----------------------------------------------------------------|---------------|------------|
| All Ages                                                       | 1,028,610,328 | 100.0      |
| 0 - 4                                                          | 110,447,164   | 10.7       |
| 5 - 9                                                          | 128,316,790   | 12.5       |
| 10 - 14                                                        | 124,846,858   | 12.1       |
| 15- 19                                                         | 100,215,890   | 9.7        |
| 20 - 24                                                        | 89,764,132    | 8.7        |
| 25 - 44                                                        | 284,008,819   | 27.6       |
| 45 - 64                                                        | 139,166,661   | 13.5       |
| 65 - 79                                                        | 41,066,824    | 4.0        |
| 80+                                                            | 8,038,718     | 0.8        |
| Less Than 18                                                   | 422,808,543   | 41.1       |
| Less than 21                                                   | 492,193,906   | 47.9       |
| Age no stated                                                  | 2,738,472     | 0.3        |
| <b>Source : C2 and C14 Table, India, Census of India 2001.</b> |               |            |

Data used for age-adjustment for adults in India Heart Watch

| Age group                                                      | Population    | Percentage | Used for age-adjustment in IHW |
|----------------------------------------------------------------|---------------|------------|--------------------------------|
| All Ages                                                       | 1,028,610,328 | 100.0      | --                             |
| Adults                                                         | 562,045,154   | --         | 100.0                          |
| 20 - 24                                                        | 89,764,132    | 8.7        | 15.97                          |
| 25 - 44                                                        | 284,008,819   | 27.6       | 50.53                          |
| 45 - 64                                                        | 139,166,661   | 13.5       | 24.76                          |
| 65 - 79                                                        | 41,066,824    | 4.0        | 7.31                           |
| 80+                                                            | 8,038,718     | 0.8        | 1.43                           |
| <b>Source : C2 and C14 Table, India, Census of India 2001.</b> |               |            |                                |

Available at: [http://censusindia.gov.in/Census\\_And\\_You/age\\_structure\\_and\\_marital\\_status.aspx](http://censusindia.gov.in/Census_And_You/age_structure_and_marital_status.aspx)
